# Supplementary material
Source: publisher site journal article supplement (https://static.cambridge.org/content/id/urn:cambridge.org:id:article:S2059866119004345/resource/name/S2059866119004345supp001.xlsx)
Supplement: Supplementary file 1 [file S2059866119004345supp001.xlsx]

## Sheet: exercise
Topics of news articles related to exercise
topic	w1	w2	w3	w4	w5	w6	w7	w8	w9	w10	w11	w12	w13	w14	w15
1	dog 0.423	class 0.234	pain 0.227	diet 0.220	train 0.214	cardio 0.169	pound 0.162	minut 0.144	reaney 0.130	zumba 0.126	treadmil 0.126	overweight 0.125	group 0.120	kettlebel 0.096	ellipt 0.096
2	murdoch 1.755	reader 0.954	kurtz 0.557	hollenbeck 0.343	rupert 0.228	cnn 0.098	news 0.089	etiquett 0.067	sigman 0.067	confess 0.064	time 0.062	politico 0.055	garfield 0.054	gladston 0.054	ploeg 0.054
3	diabet 0.343	obes 0.291	percent 0.289	risk 0.272	blood 0.259	women 0.256	dr 0.172	cancer 0.150	pressur 0.131	adult 0.131	research 0.123	higher 0.111	level 0.109	lower 0.098	fat 0.097
4	russia 0.539	ukrain 0.473	putin 0.445	russian 0.424	ukrainian 0.254	moscow 0.190	nato 0.142	sanction 0.121	vladimir 0.121	kiev 0.114	kremlin 0.114	crimea 0.099	polit 0.062	presid 0.052	state 0.046
5	space 0.859	station 0.391	shuttl 0.232	cyber 0.211	nasa 0.208	crew 0.201	astronaut 0.195	mission 0.192	orbit 0.116	earth 0.091	endeavour 0.085	dock 0.077	kbr 0.071	moon 0.071	mar 0.068
6	said 0.350	like 0.308	weight 0.301	new 0.268	fit 0.192	peopl 0.191	activ 0.161	stroke 0.146	kid 0.110	game 0.109	loss 0.101	exercis 0.093	year 0.093	reuter 0.086	use 0.086
7	studi 0.960	report 0.181	trial 0.117	email 0.104	program 0.102	said 0.102	fda 0.094	find 0.093	found 0.090	effect 0.076	increas 0.068	american 0.066	peopl 0.062	author 0.061	also 0.059
8	diseas 0.719	health 0.532	drug 0.354	patient 0.318	heart 0.288	research 0.262	treatment 0.164	medic 0.139	said 0.098	risk 0.079	sleep 0.059	peopl 0.059	medicin 0.058	test 0.051	percent 0.051
9	bariatr 1.276	stent 0.875	gastric 0.867	fibromyalgia 0.704	psoriasi 0.479	nsaid 0.394	bypass 0.391	metformin 0.391	migrain 0.367	steroid 0.342	chemotherapi 0.318	pancreat 0.310	erectil 0.254	atrial 0.202	chlorin 0.201
10	doctor 0.584	uber 0.253	care 0.232	insur 0.215	finn 0.212	physician 0.181	scout 0.168	injuri 0.140	jacobson 0.135	procedur 0.120	knee 0.119	dispensari 0.100	suprem 0.096	gay 0.079	type 0.073
11	telecom 1.660	vivendi 1.238	italia 0.923	vodafon 0.556	mediaset 0.367	saab 0.202	antitrust 0.200	cattaneo 0.124	tim 0.116	italian 0.081	bollor 0.077	stake 0.066	network 0.065	influenc 0.063	group 0.055
12	whale 0.401	zoo 0.271	beach 0.254	swan 0.232	parkour 0.223	dubai 0.150	seaworld 0.142	shark 0.133	zte 0.125	hotel 0.119	khamenei 0.107	sspx 0.107	galleri 0.100	virtualtourist 0.098	orca 0.094
13	death 0.362	two 0.265	nixon 0.163	run 0.139	minut 0.131	citi 0.118	die 0.113	center 0.106	south 0.099	time 0.097	dont 0.095	london 0.090	sander 0.089	american 0.079	interview 0.068
14	fee 0.263	share 0.179	bank 0.162	sharehold 0.144	onlin 0.143	plaintiff 0.128	judg 0.127	court 0.112	case 0.111	twitter 0.095	googl 0.094	billion 0.091	investor 0.086	facebook 0.084	search 0.081
15	warrant 0.449	ly 0.417	text 0.404	sourc 0.346	newsroom 0.300	coverag 0.281	gdynia 0.251	eikon 0.233	share 0.212	euro 0.203	crown 0.185	prostat 0.167	bishop 0.152	yen 0.144	goo 0.141
16	children 0.916	smoke 0.501	drink 0.404	exercis 0.393	therapi 0.321	sugar 0.312	insulin 0.252	muscl 0.195	said 0.143	sport 0.142	work 0.138	adolesc 0.123	reuter 0.104	would 0.098	protein 0.096

## Sheet: alcohol drinking
Topics of news articles related to alcohol drinking
topic	w1	w2	w3	w4	w5	w6	w7	w8	w9	w10	w11	w12	w13	w14	w15
1	new 0.886	peopl 0.454	one 0.370	york 0.367	like 0.354	reuter 0.226	patient 0.207	get 0.195	www 0.190	bar 0.168	take 0.163	stroke 0.153	told 0.130	com 0.096	also 0.096
2	citi 0.479	street 0.303	shop 0.207	walk 0.185	art 0.154	museum 0.150	local 0.141	head 0.124	view 0.115	pub 0.112	squar 0.097	church 0.097	river 0.087	stroll 0.079	travel 0.078
3	studi 0.306	health 0.219	research 0.209	risk 0.171	alcohol 0.159	women 0.148	cancer 0.118	found 0.088	children 0.081	diseas 0.079	smoke 0.074	obes 0.071	may 0.070	increas 0.069	men 0.066
4	rua 0.399	spa 0.332	pisco 0.259	nam 0.257	chai 0.251	kaohsiung 0.234	panoram 0.234	wat 0.213	koto 0.213	angkor 0.204	ginza 0.204	goa 0.186	twg 0.177	promenad 0.151	cachaa 0.144
5	driver 0.338	addict 0.169	cafe 0.168	drug 0.168	job 0.120	car 0.116	korean 0.107	drive 0.099	kill 0.098	south 0.094	road 0.077	korea 0.077	worker 0.075	internet 0.074	say 0.068
6	frack 0.733	shale 0.700	picken 0.444	epa 0.422	ga 0.308	szczecin 0.233	ute 0.233	glico 0.222	estrada 0.211	nauto 0.200	magaluf 0.200	olmo 0.189	grameen 0.156	detmold 0.140	sheldon 0.124
7	drink 0.593	said 0.522	water 0.252	percent 0.230	year 0.151	market 0.133	edit 0.113	cocktail 0.093	use 0.090	report 0.083	product 0.075	brand 0.070	consum 0.070	price 0.060	soft 0.059
8	space 0.645	station 0.327	nasa 0.258	astronaut 0.250	shuttl 0.232	flight 0.202	crew 0.149	mission 0.099	endeavour 0.097	spacewalk 0.094	earth 0.077	actress 0.070	spear 0.067	orbit 0.064	aboard 0.061
9	compani 0.393	hotel 0.115	busi 0.108	invest 0.099	bank 0.088	money 0.087	china 0.087	million 0.081	case 0.072	billion 0.071	custom 0.067	govern 0.065	said 0.065	media 0.063	hong 0.061
10	student 0.460	chef 0.225	restaur 0.205	milk 0.203	school 0.196	fda 0.184	calori 0.134	sodium 0.127	arsen 0.118	salt 0.104	dish 0.103	cuisin 0.099	cook 0.098	sugar 0.098	oil 0.081
11	wine 2.009	grape 0.143	bordeaux 0.129	winemak 0.126	vineyard 0.117	wineri 0.102	auction 0.095	chateau 0.074	bottl 0.064	cellar 0.063	vintag 0.057	pinot 0.057	burgundi 0.056	vine 0.048	noir 0.047
12	food 1.149	tax 0.574	meal 0.364	muslim 0.211	islam 0.196	ban 0.156	countri 0.150	beach 0.110	bloomberg 0.088	dubai 0.083	fast 0.077	ramadan 0.072	propos 0.068	govern 0.063	school 0.060
13	marijuana 1.787	nicotin 0.434	gout 0.346	painkil 0.262	psoriasi 0.234	aspirin 0.202	grader 0.199	opioid 0.190	endometri 0.185	esophag 0.179	arthriti 0.162	uspstf 0.135	bpa 0.130	naltrexon 0.129	underag 0.126
14	infect 0.468	cholera 0.228	vaccin 0.226	outbreak 0.207	contamin 0.155	viru 0.144	sanit 0.136	diarrhea 0.133	liver 0.126	flu 0.125	hiv 0.119	melamin 0.091	bacteria 0.087	kidney 0.086	diseas 0.085
15	celebr 0.262	parad 0.237	festiv 0.196	polic 0.170	danc 0.157	rio 0.157	band 0.145	carniv 0.135	parti 0.131	oktoberfest 0.131	music 0.130	cuban 0.120	cuba 0.104	havana 0.102	firework 0.089
16	abort 0.353	kalash 0.351	dwarfism 0.323	pakistani 0.304	islamist 0.265	karachi 0.218	soulcycl 0.218	brotherhood 0.209	jantji 0.199	venmo 0.194	mursi 0.190	moonshin 0.190	medvedev 0.165	miliband 0.161	oiv 0.161

## Sheet: smoking
Topics of news articles related to smoking
topic	w1	w2	w3	w4	w5	w6	w7	w8	w9	w10	w11	w12	w13	w14	w15
1	gaza 0.459	palestinian 0.384	higg 0.326	grappa 0.326	stalin 0.217	chaiten 0.192	tanksley 0.184	putin 0.184	synagogu 0.175	boson 0.167	zapatista 0.159	shisha 0.137	ebola 0.135	muslim 0.132	arab 0.126
2	new 0.368	reuter 0.245	year 0.212	show 0.179	york 0.138	ad 0.113	live 0.105	take 0.104	kid 0.101	two 0.099	like 0.099	one 0.098	parent 0.098	get 0.097	day 0.094
3	fda 1.554	morri 0.505	snu 0.290	altria 0.263	philip 0.133	lawsuit 0.118	warn 0.117	reynold 0.110	pfizer 0.094	lorillard 0.087	copd 0.079	cigarett 0.076	advair 0.068	therav 0.063	huawei 0.061
4	tobacco 0.804	cigarett 0.529	smoker 0.438	smoke 0.343	percent 0.307	countri 0.276	ban 0.264	billion 0.130	organ 0.094	among 0.084	packag 0.084	global 0.075	health 0.075	australia 0.071	year 0.070
5	teen 1.989	nicotin 0.555	adolesc 0.385	quit 0.324	wii 0.311	ubisoft 0.298	secondhand 0.284	insula 0.259	crave 0.161	patch 0.155	cessat 0.155	hookah 0.102	nintendo 0.101	pollen 0.093	game 0.093
6	museum 0.387	station 0.215	www 0.181	monterrey 0.170	citi 0.128	street 0.117	arteri 0.110	visitor 0.104	cuban 0.096	hotel 0.092	local 0.090	postcard 0.086	cape 0.083	walk 0.079	jazz 0.077
7	pollut 0.563	fire 0.196	pope 0.182	carniv 0.168	worker 0.138	firefight 0.123	radiat 0.123	reactor 0.112	dome 0.099	nuclear 0.098	japan 0.094	bolivia 0.088	baltimor 0.074	govern 0.071	crisi 0.068
8	nasa 1.248	arteri 1.106	shuttl 1.010	atlanti 0.833	cardiac 0.723	astronaut 0.590	canaver 0.489	orbit 0.374	ldl 0.285	spacewalk 0.252	hdl 0.210	coronari 0.175	pad 0.169	cargo 0.131	spacex 0.121
9	cancer 2.602	patient 0.950	marijuana 0.442	lung 0.252	statin 0.177	research 0.134	medic 0.131	breast 0.068	colorect 0.067	rate 0.064	death 0.060	caus 0.055	diagnos 0.050	found 0.048	pot 0.045
10	cook 0.441	chef 0.325	restaur 0.213	dish 0.158	food 0.155	cuisin 0.138	noma 0.085	pepper 0.085	grill 0.083	recip 0.082	chop 0.080	sauc 0.079	barbecu 0.077	minut 0.077	salt 0.072
11	heart 0.539	diseas 0.487	research 0.454	blood 0.279	women 0.249	factor 0.220	diabet 0.213	stroke 0.187	found 0.155	diet 0.143	may 0.143	pressur 0.130	age 0.124	pregnanc 0.110	weight 0.107
12	attack 2.257	islam 0.247	air 0.243	murdoch 0.127	forc 0.125	polit 0.109	republican 0.107	failur 0.100	bbc 0.099	mission 0.064	iraq 0.063	milit 0.059	benghazi 0.058	militia 0.056	iraqi 0.055
13	compani 0.448	china 0.257	market 0.199	develop 0.167	inc 0.136	million 0.132	devic 0.101	googl 0.084	data 0.082	home 0.073	make 0.072	industri 0.072	maker 0.070	program 0.067	servic 0.063
14	said 0.735	studi 0.522	risk 0.391	use 0.273	peopl 0.264	drug 0.150	also 0.146	increas 0.139	report 0.125	effect 0.109	product 0.101	includ 0.100	health 0.097	smoke 0.091	suggest 0.087

## Sheet: diet
Topics of news articles related to diet
topic	w1	w2	w3	w4	w5	w6	w7	w8	w9	w10	w11	w12	w13	w14	w15
1	supplement 1.434	tax 0.530	drink 0.426	beverag 0.385	fda 0.384	sodium 0.301	sugar 0.274	intak 0.171	aspartam 0.162	pepsico 0.154	sugari 0.128	attorney 0.125	gnc 0.123	soda 0.121	cspi 0.117
2	atkin 6.052	aerob 2.082	pregnanc 0.792	cognit 0.558	biofeedback 0.278	carbohydr 0.238	pitavastatin 0.000	hernaez 0.000	dekoski 0.000	censur 0.000	biogen 0.000	thevenot 0.000	gundersen 0.000	vidar 0.000	aquasol 0.000
3	googl 0.286	dukan 0.273	app 0.268	hardcov 0.215	microsoft 0.205	putnam 0.181	petti 0.181	schuster 0.132	wii 0.127	granni 0.117	fiction 0.115	moreno 0.112	nonfict 0.107	dragon 0.107	cricket 0.107
4	zoo 0.925	shrek 0.410	easter 0.367	urib 0.323	bruni 0.288	mcdonald 0.274	peron 0.262	papazoi 0.209	grous 0.175	socialit 0.157	chocol 0.149	horsemeat 0.148	mozart 0.134	cisna 0.110	opossum 0.110
5	studi 0.473	research 0.304	risk 0.283	percent 0.250	diabet 0.183	weight 0.174	obes 0.151	found 0.119	level 0.088	heart 0.082	patient 0.081	exercis 0.078	vitamin 0.077	diet 0.075	type 0.065
6	ate 0.703	cell 0.644	panda 0.437	bat 0.258	gene 0.249	halal 0.212	archaeologist 0.190	flore 0.176	nazi 0.168	ape 0.166	neanderth 0.147	auschwitz 0.146	mercuri 0.136	excav 0.125	reindeer 0.125
7	fruit 0.822	acid 0.649	ebola 0.640	baobab 0.273	monk 0.247	hagel 0.242	milk 0.236	liberia 0.234	beluga 0.226	astronaut 0.218	fatti 0.209	caviar 0.195	zaslavski 0.164	aquacultur 0.156	zatko 0.140
8	heart 1.813	stroke 1.264	smoke 0.781	cardiovascular 0.654	nut 0.454	fiber 0.369	red 0.254	tie 0.247	arteri 0.233	mediterranean 0.189	drank 0.187	decreas 0.162	cholesterol 0.132	epidemiolog 0.123	hdl 0.116
9	journal 0.995	york 0.526	twitter 0.236	investig 0.148	inform 0.143	murdoch 0.119	jazeera 0.113	al 0.111	column 0.078	news 0.075	british 0.073	daili 0.073	onlin 0.064	regul 0.063	shafer 0.059
10	said 0.645	children 0.385	diseas 0.337	health 0.330	peopl 0.316	help 0.171	prevent 0.164	consumpt 0.131	caus 0.128	also 0.128	meat 0.114	use 0.105	eat 0.096	dietari 0.089	told 0.086
11	chef 0.667	oil 0.415	grain 0.367	tablespoon 0.285	salt 0.207	cup 0.178	cookbook 0.150	felix 0.144	budapest 0.144	serv 0.140	oliv 0.135	allergi 0.125	wine 0.117	bean 0.100	chop 0.096
12	vivu 0.348	arena 0.318	warfarin 0.294	drug 0.289	orexigen 0.237	meridia 0.236	lorcaserin 0.197	approv 0.193	contrav 0.173	qsymia 0.166	qnexa 0.166	pradaxa 0.151	fda 0.147	phentermin 0.142	eliqui 0.128
13	may 0.843	day 0.686	per 0.312	symptom 0.258	mother 0.205	new 0.178	babi 0.173	associ 0.173	diet 0.166	find 0.162	pediatr 0.161	stress 0.142	birth 0.132	note 0.122	colleagu 0.117
14	lower 0.767	food 0.649	women 0.385	like 0.302	period 0.254	million 0.188	physic 0.178	fish 0.177	activ 0.164	ad 0.155	make 0.137	juic 0.118	would 0.112	mani 0.105	anim 0.102
15	iodin 2.259	dementia 1.736	selenium 1.498	carolina 1.397	autism 0.815	asthma 0.789	folic 0.766	multivitamin 0.740	pitavastatin 0.000	hernaez 0.000	dekoski 0.000	censur 0.000	biogen 0.000	thevenot 0.000	gundersen 0.000
16	cancer 0.934	men 0.434	women 0.421	age 0.401	take 0.170	breast 0.151	blood 0.137	increas 0.134	kidney 0.119	doctor 0.106	said 0.096	reuter 0.091	parent 0.085	look 0.083	brain 0.074

## Sheet: obesity
Topics of news articles related to obesity
topic	w1	w2	w3	w4	w5	w6	w7	w8	w9	w10	w11	w12	w13	w14	w15
1	arena 0.876	vivu 0.857	orexigen 0.672	lorcaserin 0.617	qnexa 0.569	migrain 0.554	meridia 0.473	phentermin 0.343	statin 0.285	contrav 0.218	fmc 0.181	fda 0.155	topiram 0.104	sibutramin 0.097	lorqess 0.096
2	studi 0.372	said 0.339	peopl 0.262	health 0.232	percent 0.196	obes 0.189	research 0.180	risk 0.168	reuter 0.129	diet 0.110	new 0.101	fat 0.099	heart 0.099	diseas 0.099	found 0.096
3	acomplia 0.660	trademark 0.639	republ 0.320	ofcompani 0.312	reutersspher 0.312	expresslyprohibit 0.312	cach 0.312	logo 0.262	consent 0.258	keyword 0.246	redistribut 0.240	ofreut 0.234	rimonab 0.209	zimulti 0.183	genfit 0.170
4	mice 1.012	arteri 0.590	cell 0.447	leptin 0.401	transplant 0.115	coronari 0.090	stress 0.088	npi 0.083	zukowska 0.083	telomer 0.080	alzheim 0.078	gene 0.077	tmao 0.075	graff 0.075	immun 0.072
5	athlet 1.816	sprain 0.817	cheerlead 0.785	said 0.214	high 0.209	injuri 0.131	one 0.105	percent 0.099	like 0.093	ankl 0.091	sport 0.088	among 0.070	peopl 0.069	found 0.064	coach 0.059
6	diabet 0.800	drug 0.675	blood 0.589	patient 0.298	type 0.164	treatment 0.162	insulin 0.152	cancer 0.142	cardiovascular 0.124	pressur 0.118	trial 0.118	develop 0.118	compani 0.113	market 0.102	loss 0.102
7	truck 0.672	watcher 0.627	urib 0.502	pound 0.491	bachman 0.339	sturm 0.325	taft 0.285	tall 0.249	inch 0.245	meter 0.222	bai 0.203	pet 0.188	feet 0.162	weight 0.157	pda 0.143
8	yoga 2.982	workout 1.033	preeclampsia 0.622	desk 0.411	ankl 0.275	wii 0.235	hagel 0.200	bootcamp 0.142	workstat 0.098	mckenzi 0.091	handel 0.079	walk 0.076	fit 0.074	trainer 0.070	stress 0.069
9	colon 0.458	cancer 0.444	prostat 0.400	testosteron 0.315	sperm 0.233	colorect 0.223	men 0.209	risk 0.177	endometri 0.137	polyp 0.082	colonoscopi 0.079	obes 0.078	diagnos 0.068	factor 0.065	hrt 0.064
10	mcdonald 1.691	cereal 1.128	toy 0.764	cspi 0.329	breakfast 0.223	birken 0.212	wootan 0.199	disney 0.153	baertlein 0.141	donkey 0.117	santa 0.103	happi 0.100	martinn 0.090	reformul 0.090	mill 0.080
11	children 0.515	weight 0.372	women 0.284	age 0.259	kid 0.199	babi 0.183	pregnanc 0.169	parent 0.163	mother 0.155	factor 0.151	gain 0.123	birth 0.105	hospit 0.103	pediatr 0.098	breast 0.097
12	surgeri 1.171	sleep 0.823	bariatr 0.266	gastric 0.266	bypass 0.234	patient 0.223	procedur 0.211	apnea 0.197	bmi 0.169	band 0.141	complic 0.118	weight 0.113	death 0.105	stroke 0.086	stomach 0.081
13	drink 0.310	state 0.162	rate 0.153	beverag 0.147	year 0.139	measur 0.132	public 0.128	program 0.125	citi 0.121	soda 0.114	million 0.114	would 0.108	tax 0.098	sugari 0.093	school 0.086
14	knee 1.513	flash 0.490	menopaus 0.424	pco 0.265	rio 0.230	hot 0.207	girl 0.169	osteoarthr 0.166	sexual 0.160	fertil 0.136	game 0.132	lesbian 0.126	peta 0.117	palestinian 0.113	arthriti 0.108
15	chef 0.834	student 0.455	tv 0.413	chocol 0.281	salad 0.277	usda 0.275	pyramid 0.229	lunch 0.215	school 0.144	agricultur 0.140	kitchen 0.140	veggi 0.139	cook 0.122	pantri 0.121	oven 0.121

## Sheet: sexual behavior
Topics of news articles related to sexual behavior
topic	w1	w2	w3	w4	w5	w6	w7	w8	w9	w10	w11	w12	w13	w14	w15
1	dysfunct 0.468	testosteron 0.441	prostat 0.426	erectil 0.347	ptsd 0.205	gel 0.190	menopaus 0.170	men 0.162	viagra 0.156	function 0.146	antidepress 0.140	diabet 0.110	ejacul 0.102	estrogen 0.098	urolog 0.092
2	cancer 0.675	hpv 0.323	vaccin 0.283	men 0.238	viru 0.193	cervic 0.187	circumcis 0.147	test 0.143	screen 0.111	human 0.099	said 0.090	case 0.089	women 0.086	gardasil 0.082	pap 0.075
3	homo 1.326	pao 1.061	erectu 0.823	autism 0.663	lonsdal 0.549	clougherti 0.434	gene 0.431	kleiner 0.353	giraff 0.315	yawn 0.282	asd 0.236	twin 0.190	habili 0.144	venter 0.112	offspr 0.101
4	peopl 0.670	like 0.434	student 0.297	live 0.154	time 0.136	roman 0.122	rome 0.115	way 0.115	also 0.093	young 0.085	men 0.082	say 0.077	million 0.069	call 0.066	militari 0.065
5	myspac 0.633	circuit 0.301	offend 0.236	sext 0.228	abbvi 0.177	abduct 0.121	windsor 0.102	said 0.101	juror 0.095	chaperon 0.094	oscannlain 0.091	court 0.090	blumenth 0.086	kidnap 0.083	restavek 0.080
6	hp 0.432	hurd 0.378	cain 0.323	harass 0.242	clinton 0.156	politico 0.152	accus 0.113	fisher 0.112	hillari 0.098	lane 0.093	said 0.089	scooter 0.084	herman 0.079	weiner 0.079	oracl 0.079
7	gay 0.913	gender 0.222	bisexu 0.210	transgend 0.210	lesbian 0.186	right 0.162	commun 0.160	citi 0.151	lgbt 0.119	countri 0.115	said 0.091	homosexu 0.088	equal 0.068	discrimin 0.064	first 0.064
8	abus 0.896	kid 0.593	drink 0.551	violenc 0.355	bulli 0.295	alcohol 0.282	depress 0.277	puberti 0.236	maltreat 0.226	victim 0.160	bing 0.154	aborigin 0.117	behavior 0.114	child 0.107	physic 0.104
9	church 0.882	cathol 0.470	pope 0.366	vatican 0.334	bishop 0.295	priest 0.235	franci 0.140	benedict 0.125	said 0.120	anglican 0.095	abus 0.087	cardin 0.084	archbishop 0.077	dioces 0.069	clergi 0.065
10	film 0.364	life 0.248	sex 0.189	hospit 0.173	presid 0.156	love 0.135	edit 0.116	islam 0.114	state 0.112	india 0.094	two 0.084	polit 0.072	man 0.069	stori 0.069	public 0.068
11	assang 0.750	wikileak 0.735	cabl 0.244	hacker 0.195	leak 0.143	julian 0.138	leaker 0.125	extradit 0.113	said 0.106	cyber 0.099	romney 0.092	openleak 0.087	greenleak 0.081	visa 0.078	mastercard 0.066
12	uber 0.798	googl 0.536	kalanick 0.195	game 0.158	youtub 0.131	said 0.125	lyft 0.105	alphabet 0.105	driver 0.089	compani 0.082	airbnb 0.080	holder 0.076	video 0.068	patrol 0.064	iphon 0.058
13	hiv 2.512	syphili 0.353	gonorrhea 0.285	antibiot 0.222	aid 0.221	chlamydia 0.176	liberia 0.153	ebola 0.148	fgm 0.112	epidem 0.078	drug 0.076	sierra 0.076	leon 0.053	superbug 0.051	spread 0.046
14	traffick 1.196	dinosaur 0.514	escort 0.445	prostitut 0.434	rickshaw 0.403	teva 0.390	mam 0.361	berlusconi 0.328	rentboy 0.278	brothel 0.266	ella 0.224	sebeliu 0.219	prescript 0.156	aslam 0.139	org 0.109
15	facebook 0.332	marriag 0.236	compani 0.229	orient 0.185	court 0.184	law 0.170	group 0.166	edit 0.147	site 0.131	epstein 0.110	book 0.091	violenc 0.089	ban 0.088	case 0.082	websit 0.082
16	artist 0.510	exhibit 0.352	art 0.290	galleri 0.281	prize 0.236	fiction 0.215	munro 0.181	museum 0.161	beluga 0.131	erot 0.129	nonviol 0.127	paint 0.124	portrait 0.122	caviar 0.113	mermaid 0.104
17	said 0.346	women 0.254	studi 0.236	percent 0.213	health 0.173	research 0.156	use 0.140	sexual 0.117	new 0.115	report 0.112	reuter 0.093	year 0.092	infect 0.068	one 0.067	risk 0.064
18	zika 1.118	microcephali 0.354	brazil 0.296	outbreak 0.277	mosquito 0.238	transmiss 0.234	viru 0.197	territori 0.132	case 0.131	defect 0.125	infect 0.124	health 0.119	said 0.090	feb 0.088	suspect 0.086

## Sheet: depression
Topics of news articles related to depression
topic	w1	w2	w3	w4	w5	w6	w7	w8	w9	w10	w11	w12	w13	w14	w15
1	solar 0.211	samsung 0.183	percent 0.099	casino 0.094	hemingway 0.092	micromax 0.084	demand 0.082	euro 0.081	group 0.075	siemen 0.072	sector 0.066	lg 0.064	nokia 0.062	memori 0.062	chip 0.062
2	headach 0.261	flu 0.238	econom 0.219	monetari 0.195	smell 0.195	fed 0.177	world 0.136	polici 0.133	bernank 0.127	paulo 0.116	food 0.108	viru 0.090	fiscal 0.084	robbin 0.083	lupu 0.070
3	said 1.366	peopl 0.441	colleagu 0.145	also 0.142	time 0.137	one 0.135	two 0.108	death 0.098	depress 0.095	case 0.094	could 0.089	reuter 0.085	mother 0.084	author 0.082	young 0.078
4	women 1.964	mental 0.255	pregnanc 0.175	abort 0.144	men 0.120	psycholog 0.119	problem 0.111	republican 0.110	ill 0.107	american 0.073	email 0.068	obama 0.066	romney 0.062	democrat 0.062	stress 0.061
5	snowden 0.182	monk 0.153	sourc 0.144	london 0.120	new 0.103	nsa 0.094	hoop 0.091	militari 0.082	shafer 0.081	govern 0.076	navajo 0.065	fashion 0.062	book 0.059	chicago 0.058	kashgari 0.057
6	therapi 1.876	abus 0.383	suicid 0.245	wine 0.238	drink 0.142	corn 0.089	alcohol 0.077	surgeri 0.076	ireland 0.067	nxp 0.066	church 0.059	barilla 0.058	surgeon 0.057	qualcomm 0.056	bueno 0.056
7	care 0.764	exercis 0.515	hospit 0.364	heart 0.250	particip 0.181	blood 0.148	medic 0.141	like 0.138	program 0.138	center 0.137	improv 0.120	problem 0.085	physic 0.085	level 0.078	nurs 0.074
8	appl 0.524	ipad 0.214	iphon 0.176	devic 0.113	holiday 0.105	amazon 0.100	rim 0.096	blackberri 0.096	store 0.094	retail 0.080	yahoo 0.078	ipo 0.078	compani 0.072	new 0.072	still 0.066
9	yoga 0.969	concuss 0.840	cognit 0.787	cbt 0.462	caregiv 0.390	menopaus 0.340	medit 0.291	session 0.211	fatigu 0.187	stroke 0.157	acupunctur 0.149	valerian 0.138	cte 0.132	apnea 0.121	ptsd 0.115
10	deploy 3.732	dsm 0.645	fgm 0.631	nukak 0.606	troop 0.566	ebola 0.517	palestinian 0.375	whiten 0.292	leon 0.179	reservist 0.160	ptsd 0.151	preeclampsia 0.142	gaza 0.125	emond 0.113	combat 0.104
11	tax 0.398	debt 0.201	increas 0.157	putin 0.154	gdp 0.146	ukrain 0.134	incom 0.130	mortgag 0.125	economi 0.114	olympu 0.094	creditor 0.091	fur 0.086	russia 0.084	intervent 0.072	auster 0.072
12	studi 0.343	health 0.309	research 0.235	percent 0.207	patient 0.195	drug 0.191	depress 0.165	risk 0.159	new 0.156	treatment 0.126	use 0.117	disord 0.111	found 0.104	symptom 0.102	diseas 0.089
13	sleep 1.099	child 0.506	bulli 0.294	school 0.264	parent 0.249	kid 0.211	teen 0.131	ly 0.127	transgend 0.116	boy 0.111	babi 0.110	children 0.109	problem 0.095	obes 0.089	univers 0.086
14	testosteron 0.635	lundbeck 0.445	chantix 0.424	nicotin 0.326	ketamin 0.286	smoker 0.237	sanofi 0.190	orexigen 0.150	trademark 0.145	acomplia 0.138	smoke 0.138	pristiq 0.119	contrav 0.112	patch 0.105	marijuana 0.090
15	onlin 0.549	internet 0.547	social 0.202	univers 0.123	sourc 0.120	student 0.113	data 0.098	bit 0.092	score 0.089	addict 0.088	servic 0.085	person 0.077	fcc 0.073	facebook 0.058	comput 0.054

## Sheet: pregnancy
Topics of news articles related to pregnancy
topic	w1	w2	w3	w4	w5	w6	w7	w8	w9	w10	w11	w12	w13	w14	w15
1	teen 0.970	sex 0.386	marriag 0.318	girl 0.290	educ 0.209	pediatr 0.180	adhd 0.144	youth 0.129	essur 0.129	school 0.123	student 0.106	alcohol 0.099	survey 0.090	behavior 0.086	vagin 0.084
2	cathol 0.691	nuclear 0.562	church 0.536	barr 0.249	teva 0.221	poland 0.219	reactor 0.189	chernobyl 0.183	korman 0.153	geotherm 0.140	plant 0.140	prostat 0.109	pope 0.100	sebeliu 0.091	mental 0.088
3	zika 1.360	microcephali 0.494	brazil 0.376	mosquito 0.259	viru 0.188	case 0.127	territori 0.112	suspect 0.097	women 0.093	confirm 0.084	colombia 0.083	puerto 0.082	rico 0.075	said 0.074	pregnant 0.068
4	diabet 1.420	gestat 0.537	develop 0.133	facebook 0.122	born 0.115	sugar 0.108	blood 0.105	risk 0.104	type 0.093	glucos 0.090	compani 0.083	percent 0.075	insulin 0.069	studi 0.067	quit 0.067
5	whoop 1.119	ms 1.064	cough 0.303	pertussi 0.285	tdap 0.260	bpa 0.256	atala 0.250	nicu 0.242	pbde 0.241	agd 0.231	caskey 0.194	organophosph 0.185	vaccin 0.183	flame 0.167	blastocyst 0.157
6	ivf 0.898	embryo 0.740	prematur 0.266	egg 0.247	vitro 0.222	surrog 0.206	surrogaci 0.162	fertil 0.159	transfer 0.153	frozen 0.148	triplet 0.115	transplant 0.092	freez 0.077	sperm 0.069	babi 0.062
7	wellpoint 0.873	antiretrovir 0.563	unitedhealth 0.403	policyhold 0.381	resciss 0.358	burkina 0.246	breast 0.244	schistosomiasi 0.179	reill 0.161	satekg 0.149	insur 0.145	unicef 0.144	care 0.118	compani 0.109	fg 0.109
8	said 0.842	infect 0.326	percent 0.265	report 0.194	health 0.154	diseas 0.142	rate 0.131	case 0.116	outbreak 0.111	sexual 0.102	one 0.094	peopl 0.092	treatment 0.089	transmit 0.085	studi 0.081
9	depress 1.234	antidepress 0.493	caffein 0.379	acupunctur 0.334	sleep 0.211	ssri 0.200	secondhand 0.172	psychiatri 0.114	celiac 0.103	yoga 0.094	zoloft 0.089	women 0.081	pregnanc 0.081	psychiatr 0.073	postpartum 0.072
10	women 0.454	pregnanc 0.280	studi 0.184	research 0.142	weight 0.142	birth 0.139	obes 0.113	babi 0.105	risk 0.105	children 0.103	mother 0.102	pregnant 0.098	smoke 0.094	new 0.089	may 0.089
11	preterm 2.265	labor 1.130	induct 0.725	palsi 0.332	marijuana 0.325	cerebr 0.287	magnesium 0.250	aspirin 0.231	epidur 0.221	ra 0.209	nsaid 0.173	sulfat 0.139	ibuprofen 0.134	corticosteroid 0.130	prematur 0.116
12	abort 1.505	law 0.546	court 0.283	parenthood 0.210	ban 0.195	bill 0.176	republican 0.164	legisl 0.110	suprem 0.110	governor 0.105	texa 0.104	state 0.090	arizona 0.086	dakota 0.074	senat 0.066
13	euro 0.280	omega 0.250	star 0.182	thalidomid 0.154	actress 0.147	princ 0.144	magazin 0.128	sarkozi 0.126	style 0.122	bruni 0.096	movi 0.089	singer 0.086	mayer 0.082	duchess 0.075	turnov 0.075
14	contracept 0.903	iud 0.485	implant 0.211	devic 0.200	method 0.188	women 0.154	clot 0.110	said 0.098	use 0.097	insert 0.094	cigarett 0.091	pill 0.088	intrauterin 0.072	copper 0.071	douch 0.070
15	vitamin 0.444	acid 0.369	supplement 0.352	folic 0.288	fish 0.221	women 0.176	asthma 0.157	intak 0.144	brain 0.141	iron 0.137	defici 0.103	autism 0.102	pregnanc 0.094	ate 0.088	studi 0.081

## Sheet: asthma
00:00:00	drug 0.791	inhal 0.247	price 0.224	gener 0.195	medicin 0.194	merck 0.128	epa 0.098	use 0.095	percent 0.090	cost 0.088	pharmaceut 0.084	rule 0.083	fda 0.080	teva 0.079	emiss 0.077
Topics of news articles related to asthma
topic	w1	w2	w3	w4	w5	w6	w7	w8	w9	w10	w11	w12	w13	w14	w15
1	care 0.646	hospit 0.447	insur 0.259	visit 0.129	health 0.123	uninsur 0.120	yoga 0.118	medic 0.102	nurs 0.090	doctor 0.087	er 0.081	physician 0.076	healthcar 0.075	patient 0.072	primari 0.069
2	vitamin 0.874	women 0.248	diet 0.188	fish 0.142	fruit 0.122	studi 0.118	veget 0.116	appl 0.108	asthma 0.105	pregnanc 0.101	supplement 0.095	intak 0.094	folic 0.085	calcium 0.083	level 0.083
3	obes 1.095	overweight 0.411	weight 0.344	bmi 0.144	asthma 0.141	diabet 0.120	surgeri 0.111	studi 0.100	children 0.094	cesarean 0.089	adult 0.085	percent 0.080	risk 0.079	birth 0.079	born 0.072
4	gene 0.528	pain 0.184	variant 0.150	genet 0.136	acupunctur 0.129	incens 0.122	institut 0.109	prize 0.105	steroid 0.090	diseas 0.089	trait 0.086	scientist 0.082	studi 0.078	research 0.077	ant 0.075
5	asthma 0.351	allergi 0.324	studi 0.303	children 0.262	research 0.203	percent 0.129	risk 0.114	health 0.107	new 0.104	peanut 0.101	may 0.096	antibiot 0.094	parent 0.089	journal 0.087	kid 0.087
6	depress 0.746	anxieti 0.720	suicid 0.705	app 0.230	epinephrin 0.169	bond 0.129	abus 0.126	scott 0.109	adren 0.109	pepper 0.101	asthma 0.099	art 0.097	psychiatr 0.083	stress 0.082	maltreat 0.078
7	cancer 0.550	patent 0.324	india 0.281	firefight 0.265	drug 0.138	dynavax 0.126	program 0.105	tumor 0.096	pepsico 0.090	roch 0.082	indian 0.081	said 0.072	revok 0.070	rupe 0.066	pharma 0.065
8	smoke 1.628	secondhand 0.315	tobacco 0.263	exposur 0.220	cigarett 0.199	smoker 0.179	children 0.113	studi 0.097	marijuana 0.080	health 0.074	asthma 0.073	said 0.073	research 0.070	parent 0.069	risk 0.058
9	medicar 0.425	medic 0.202	fraud 0.194	pharmaci 0.172	bill 0.166	compound 0.161	genom 0.122	acosta 0.107	pharmacist 0.104	medicaid 0.102	heimlich 0.099	wheelchair 0.087	obama 0.081	beneficiari 0.079	florida 0.073
10	vaccin 1.237	flu 0.965	season 0.307	swine 0.230	pandem 0.220	influenza 0.213	shot 0.142	said 0.127	medimmun 0.103	children 0.089	viru 0.081	schuchat 0.080	peopl 0.067	sebeliu 0.062	spray 0.061
11	patient 0.497	sever 0.244	regeneron 0.223	dupilumab 0.180	drug 0.164	approv 0.157	asthma 0.155	nucala 0.145	sanofi 0.144	eosinophil 0.135	xolair 0.133	inject 0.126	treatment 0.107	benralizumab 0.096	mepolizumab 0.088
12	advair 0.603	gsk 0.405	laba 0.234	breo 0.212	glaxo 0.179	mylan 0.154	drug 0.146	fda 0.116	agonist 0.114	inhal 0.112	corticosteroid 0.110	asthma 0.109	serev 0.108	therav 0.104	ellipta 0.100
13	pool 0.441	health 0.323	chlorin 0.280	lung 0.173	bernard 0.135	violenc 0.131	respiratori 0.121	peopl 0.120	bleach 0.108	incent 0.104	swimmer 0.102	chemic 0.089	athlet 0.082	clean 0.080	breath 0.078
14	breastfeed 0.434	tamiflu 0.356	viru 0.232	breastfe 0.188	relenza 0.181	infect 0.180	virus 0.146	antivir 0.131	breastf 0.130	ill 0.114	cdc 0.103	outbreak 0.092	said 0.088	resist 0.078	cadet 0.078
15	astrazeneca 0.286	vectura 0.265	million 0.232	compani 0.176	flutiform 0.142	mileston 0.125	skyepharma 0.123	edit 0.120	circassia 0.118	share 0.111	pipelin 0.097	penc 0.097	london 0.096	reuter 0.094	bengaluru 0.080
16	said 1.026	reuter 0.167	peopl 0.136	swim 0.125	problem 0.117	game 0.117	nyad 0.104	dose 0.091	cattl 0.086	medic 0.076	told 0.072	go 0.066	water 0.064	florida 0.064	one 0.064
17	pollut 0.792	air 0.425	mold 0.308	pollen 0.221	ozon 0.211	traffic 0.169	damp 0.108	asthma 0.092	exposur 0.086	dust 0.086	particl 0.081	cockroach 0.080	studi 0.077	visibl 0.068	climat 0.065

## Sheet: air pollution
Topics of news articles related to air pollution
topic	w1	w2	w3	w4	w5	w6	w7	w8	w9	w10	w11	w12	w13	w14	w15
1	epa 0.603	rule 0.455	emiss 0.177	regul 0.174	plant 0.172	texa 0.161	agenc 0.151	power 0.150	would 0.129	standard 0.126	fcc 0.123	state 0.111	could 0.102	propos 0.101	reduc 0.094
2	said 0.642	cancer 0.537	percent 0.215	alzheim 0.209	countri 0.194	survey 0.180	patient 0.161	report 0.152	may 0.146	peopl 0.123	alcohol 0.122	curri 0.122	cell 0.112	brain 0.111	food 0.104
3	copd 1.005	shale 0.353	autism 0.276	ga 0.201	al 0.176	exposur 0.156	boy 0.121	broccoli 0.109	smoke 0.092	male 0.091	obstruct 0.090	folic 0.089	extract 0.089	studi 0.087	chemic 0.086
4	judg 0.760	philip 0.428	recus 0.316	bennett 0.305	lawyer 0.305	morri 0.251	imparti 0.182	circuit 0.177	garden 0.160	doubt 0.155	articl 0.131	hell 0.128	trial 0.123	navistar 0.123	dire 0.123
5	court 0.612	nixon 0.507	egan 0.268	embassi 0.239	search 0.201	toyota 0.201	suprem 0.163	hybrid 0.159	gene 0.150	india 0.143	patent 0.136	polit 0.110	north 0.104	korean 0.089	rehnquist 0.087
6	health 0.801	sleep 0.364	temperatur 0.285	weather 0.280	death 0.236	apnea 0.230	breath 0.157	studi 0.156	research 0.147	problem 0.136	blackout 0.133	condit 0.120	time 0.101	journal 0.093	chang 0.092
7	ebola 0.711	viru 0.284	outbreak 0.271	infect 0.249	africa 0.175	said 0.134	spread 0.126	diseas 0.121	univers 0.120	suit 0.117	guinea 0.115	west 0.113	sierra 0.105	hospit 0.101	leon 0.092
8	nuclear 0.543	coal 0.468	nobel 0.432	prize 0.408	chemistri 0.222	clock 0.188	defect 0.165	power 0.142	scienc 0.129	biolog 0.126	ertl 0.124	reactor 0.116	plant 0.094	kan 0.093	birth 0.089
9	diabet 0.777	blood 0.440	arteri 0.215	exercis 0.186	pressur 0.179	cardiovascular 0.170	high 0.152	circul 0.139	cholesterol 0.126	pollut 0.117	vessel 0.114	pm 0.113	particip 0.112	diseas 0.103	air 0.101
10	charg 0.519	congest 0.448	electr 0.396	scheme 0.260	bike 0.197	london 0.170	vehicl 0.121	demand 0.116	cycl 0.108	traffic 0.094	car 0.093	barcelona 0.092	film 0.092	peak 0.082	commut 0.081
11	heart 0.806	ozon 0.468	studi 0.398	particl 0.279	arrest 0.233	cardiac 0.222	particul 0.186	lung 0.179	risk 0.170	pollut 0.147	increas 0.141	peopl 0.132	diseas 0.129	air 0.115	associ 0.112
12	stroke 0.597	warm 0.461	climat 0.437	sea 0.214	carbon 0.194	radiat 0.155	greenhous 0.149	centuri 0.128	level 0.126	shijiazhuang 0.113	rise 0.112	project 0.110	global 0.106	goal 0.095	japan 0.089
13	smoke 0.791	nois 0.623	meat 0.606	aircraft 0.206	burger 0.155	pope 0.149	ban 0.122	snore 0.120	cultur 0.116	exposur 0.098	nonsmok 0.098	cigarett 0.096	decibel 0.089	hookah 0.081	tobacco 0.081
14	batteri 0.223	automak 0.213	digit 0.190	van 0.179	deutsch 0.162	music 0.152	platform 0.144	format 0.144	shen 0.138	lg 0.138	allianc 0.131	supplier 0.121	manufactur 0.116	market 0.101	china 0.097
15	asthma 1.658	kid 0.300	antibodi 0.253	mold 0.169	pollen 0.164	children 0.153	arthriti 0.151	allerg 0.137	rheumatoid 0.133	cockroach 0.120	allergen 0.111	wilson 0.106	allergi 0.100	parent 0.095	pollut 0.092
16	air 0.294	cognit 0.229	live 0.207	pollut 0.172	function 0.164	anxieti 0.150	exposur 0.148	level 0.143	dementia 0.138	ulcer 0.138	kaplan 0.138	meter 0.138	qualiti 0.125	nitrogen 0.121	lung 0.114
17	children 0.477	china 0.445	pneumonia 0.422	lead 0.158	insur 0.149	vitamin 0.138	smog 0.129	health 0.123	xinhua 0.110	liu 0.106	coverag 0.100	respiratori 0.088	said 0.087	rate 0.084	pollut 0.084
18	women 0.495	birth 0.386	pregnanc 0.343	fertil 0.299	preterm 0.245	babi 0.196	sperm 0.167	ivf 0.152	research 0.144	studi 0.121	coupl 0.120	infertil 0.118	woman 0.116	weight 0.115	reproduct 0.108
19	pollut 0.665	air 0.387	car 0.364	beij 0.314	citi 0.295	kong 0.273	hong 0.267	year 0.254	buse 0.164	chines 0.146	new 0.120	reuter 0.094	mexico 0.089	tourist 0.088	said 0.083
20	dalla 0.307	airport 0.275	chimney 0.269	facebook 0.241	airlin 0.232	duncan 0.182	survivor 0.182	wast 0.168	cafferkey 0.148	export 0.146	ebola 0.118	liberia 0.118	offshor 0.116	sweep 0.106	drill 0.096
